# Supplementary material for: Inhibition of p300/CBP-Associated Factor Attenuates Renal Tubulointerstitial Fibrosis through Modulation of NF-kB and Nrf2
Source: MDPI journal article supplement (doi:10.3390/ijms20071554), 2019-03-28
Supplement: s1 [file s1]

# Supplementary Material: Inhibition of p300/CBP-Associated Factor Attenuates Renal Tubulointerstitial Fibrosis through Modulation of NF- $\kappa$ B and Nrf2

Sungjin Chung<sup>1</sup>, Soojeong Kim<sup>2</sup>, Mina Son<sup>1</sup>, Minyoung Kim<sup>1</sup>, Eun Sil Koh<sup>1</sup>, Seok Joon Shin<sup>1</sup>, Cheol Whee Park<sup>1</sup> and Ho-Shik Kim<sup>2\*</sup>

- <sup>1</sup> Department of Internal Medicine, College of Medicine, The Catholic University of Korea, 222, Banpo-daero, Seocho-gu, Seoul 06591, Republic of Korea; chungs@catholic.ac.kr (S.C.); sma0917@naver.com (M.S.); gomy33@naver.com (M.K.); fiji79@catholic.ac.kr (E.S.K.); imkidney@catholic.ac.kr (S.J.S.); cheolwhee@hanmail.net (C.W.P.)
  - <sup>2</sup> Department of Biochemistry, College of Medicine, The Catholic University of Korea, 222, Banpo-daero, Seocho-gu, Seoul 06591, Republic of Korea; soojeong107@hanmail.net (S.K.); hoshik@catholic.ac.kr (H.-S.K.)
- \* Correspondence: hoshik@catholic.ac.kr; Tel.: +82-2-2258-7294

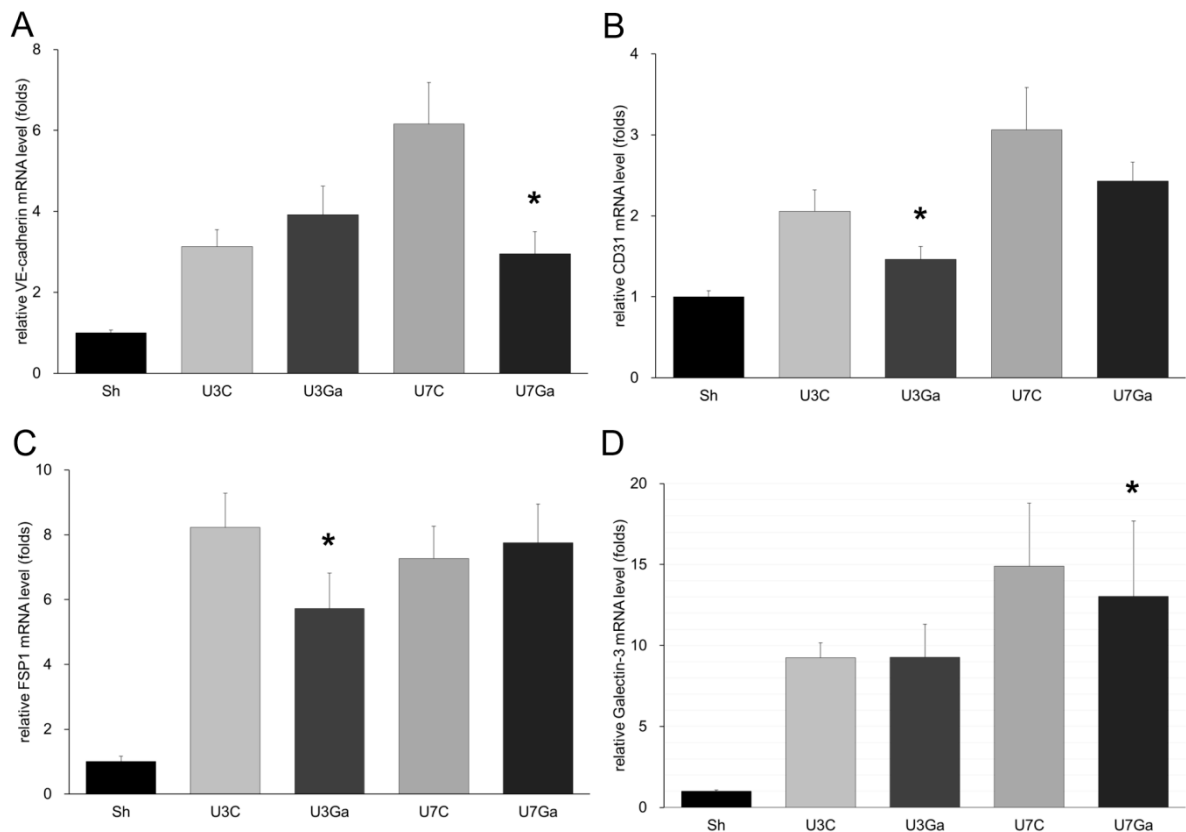

**Figure S1.** Renal mRNA levels of vascular endothelial or tubular epithelial makers with or without garcinol treatment after UUO. (A) Renal VE-cadherin mRNA level was upregulated by UUO. With garcinol treatment, its level was decreased at day 7 post-UUO. \* $P = 0.005$  vs. U7C. (B) Renal mRNA level of CD31 was significantly decreased by garcinol at day 3 post-UUO. \* $P = 0.010$  vs. U3C. (C) Renal mRNA level of FSP-1 was significantly elevated in the obstructed kidneys but significantly decreased by garcinol at day 3 post-UUO. \* $P = 0.006$  vs. U3C. (D) Renal mRNA of Galectin-3, significantly increased in response to injury induced by obstruction, was decreased by garcinol at day 7 post-UUO. \* $P = 0.006$  vs. U7C.

**Table S1.** Sequences of primers used for qRT-PCR.

| Gene           | Forward                        | Reverse                           |
|----------------|--------------------------------|-----------------------------------|
| TGF- $\beta$ 1 | GAC CGC AAC AAC GCC ATC TA     | GGC GTA TCA GTG GGG GTC AG        |
| $\alpha$ -SMA  | GGA GAA GCC CAG CCA GTC GC     | AGC CGG CCT TAC AGA GCC CA        |
| Vimentin       | CGG AAA GTG GAA TCC TTG CA     | CAC ATC GAT CTG GAC ATG CTG T     |
| Fibronectin    | GAA GTC GCA AGG AAA CAA GC     | GTT GTA GGT GAA CGG GAG GA        |
| MMP-2          | GCC TCA TAC ACA GCG TCA ATC TT | CGG TTT ATT TGG CGG ACA GT        |
| MMP-9          | CCT GGA ACT CAC ACG ACA TCT TC | TGG AAA CTC ACA CGC CAG AA        |
| E-cadherin     | ATC CTC GCC CTG CTG CTT        | ACC ACC GTT CTC CTC CGT A         |
| IL-6           | TGT ATG AAC AAC GAT GAT GCA    | GGT ACT CCA GAA GAC CAG AGG AAA T |
| TNF- $\alpha$  | CCC AGA CCC TCA CAC TCA GAT C  | CCT CCA CTT GGT GGT TTG CT        |
| VE-cadherin    | GTT CAA GTT TGC CCT GAA GAA    | GTG ATG TTG GCG GTG TTG T         |
| CD31           | GAC TCA CGC TGG TGC TCT ATG C  | TCA GTT GCT GCC CAT TCA TCA       |
| FSP-1          | GGA GCT GCC TAG CTT CCT G      | GCT GTC CAA GTT GCT CAT CA        |
| Galectin-3     | TTG AAG CTG ACC ACT TCA AGG TT | AGG TTC TTC ATC CGA TGG TTG T     |
